# Supplementary material for: Mathematical Modeling Identifies Inhibitors of Apoptosis as Mediators of Positive Feedback and Bistability
Source: PLOS journal article supplement (doi:10.1371/journal.pcbi.0020120), 2006-09-12
Supplement: S3 (10.1371/journal.pcbi.0020120.s003) [file journal.pcbi.0020120.s003]

## Supplement S3: An *in vitro* Test for XIAP-mediated Feedback

In the main text we predicted that XIAP mediates positive feedback and bistability in the intrinsic pathway. In the following we describe an *in vitro* experiment designed to confirm that sequestration of XIAP by Casp3 indeed results in feedback amplification.

|                           | Experiment 1 | Experiment 2 | Control 1 | Control 2 |
|---------------------------|--------------|--------------|-----------|-----------|
| cyto c                    | +            | +            | +         | +         |
| dATP                      | +            | +            | +         | +         |
| Apaf-1                    | +            | +            | +         | +         |
| pro-Casp9 (D330A)         | +            | +            | +         | +         |
| full-length XIAP          | +            | +            | -         | -         |
| BIR1-BIR2 (XIAP fragment) | -            | -            | +         | +         |
| BIR3-RING (XIAP fragment) | -            | -            | +         | +         |
| pro-Casp3                 | -            | +            | -         | +         |
| Readout (Casp9 activity)  | $E_1$        | $E_2$        | $C_1$     | $C_2$     |

Table S2: Proposed reaction mixtures for an *in vitro* test experiment for XIAP-mediated feedback (see text)

XIAP is known to suppress the activity of apoptosome-activated Casp9 *in vitro* [1], but according to the results given in the main text excess pro-Casp3 should reverse this inhibition by sequestering XIAP away from Casp9. The proposed experiments ('Experiment 1' and 'Experiment 2') are summarized in Table S2: The pro-Casp9 mutant D330A, which is refractory towards feedback cleavage by Casp3, should be activated *in vitro* by adding cyto c, dATP, and Apaf-1 [1]. Full-length XIAP is added to both 'Experiment' reaction mixtures, while pro-Casp3 is present in Experiment 2 (feedback on), but absent in Experiment 1 (feedback on). Then, the Casp9 activities ( $E_1$  and  $E_2$ ) of both reaction mixtures should be measured as a readout.

The predicted results are shown in Fig. S3. Here, the ratio of Casp9 activities with and without Casp3 ( $E_2 / E_1$ ) as a measure of (XIAP-mediated) feedback strength is plotted against the XIAP concentration. As expected, XIAP-mediated feedback is especially pronounced for intermediate XIAP concentrations, where  $C9_{tot} < XIAP_{tot} < C3_{tot}$  ( $C9_{tot} = 20$  nM in these simulations). Additionally, an increase in the Casp3 concentration improves feedback strength, and also widens the range of XIAP concentrations, where feedback is observed. Therefore, the *in vitro* experiments should be done using low Casp9 concentrations, high Casp3 concentrations and intermediate XIAP concentrations ( $XIAP_{tot} \approx \frac{3}{4} C3_{tot}$ ; see Fig. S3). Additional simulations revealed that the results shown in Fig. S3 are independent of the concentrations of active Apaf-1, but sufficiently high Apaf1-levels should be chosen in order to minimize errors.

As a control experiment, the whole procedure should be repeated with the XIAP fragments, BIR1-BIR2 (specific for Casp3) and BIR3-RING (specific for Casp9), instead of full-length XIAP (see Table S3). These controls mimic non-competitive caspase inhibition, so that the feedback strength ( $C_2 / C_1$ ) is predicted to equal unity regardless of the protein concentrations chosen.

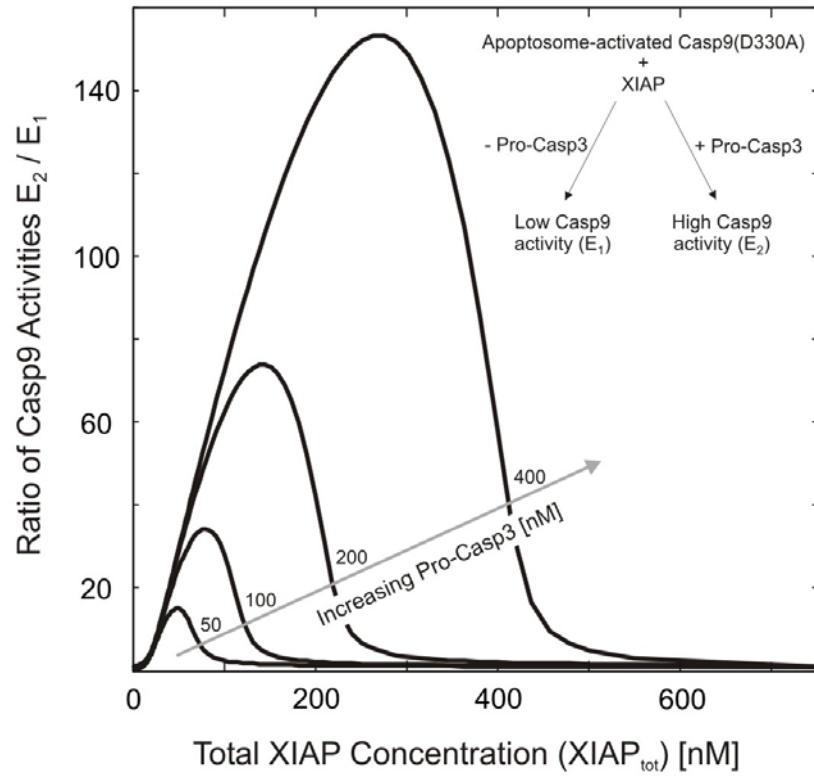

Figure S3: Predicted results of an *in vitro* test experiment for XIAP-mediated feedback. *In vitro* behaviour of the caspase cascade with mutant Casp9 (D330A) was modeled by eliminating Casp3-mediated feedback cleavage ( $v_4$  and  $v_5$ ) and protein synthesis/degradation reactions ( $v_{16}$  -  $v_{28}$ ) from the differential equations given in Supplement S1 (see text for details).

## REFERENCE

1. Zou H, Yang R, Hao J, Wang J, Sun C, et al. (2003) Regulation of the Apaf-1/caspase-9 apoptosome by caspase-3 and XIAP. J Biol Chem 278: 8091-8098.
